# Supplementary material for: Electrochemiluminescence on bipolar electrodes for visual bioanalysis
Source: Royal Society of Chemistry journal article supplement (doi:10.1039/c2sc22055e), 2012-12-22
Supplement: c2sc22055e.pdf [file c2sc22055e.pdf]

# Electrochemiluminescence on Bipolar Electrodes for Visual Bioanalysis

*Mei-Sheng Wu, Da-Jing Yuan, Jing-Juan Xu\*, Hong-Yuan Chen*

State key Laboratory of Analytical Chemistry for Life Science, School of Chemistry and Chemical Engineering, Nanjing University, Nanjing 210093, China; E-mail address: xujj@nju.edu.cn (J.J. Xu)

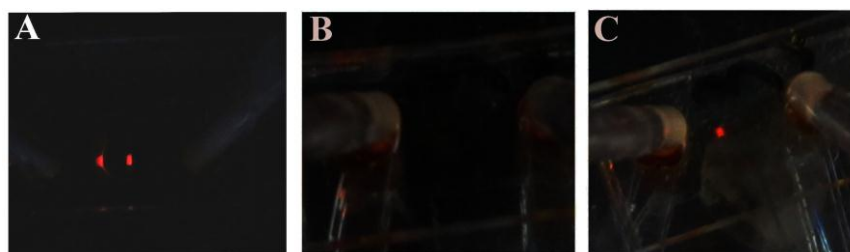

**Fig. S1** Photographs of the wireless ECL device before (A, B) and after (C) sensing 14.0  $\mu\text{g/mL}$  PSA. (A) 12.0 V, (B) 7.0 V, (C) 7.0 V.

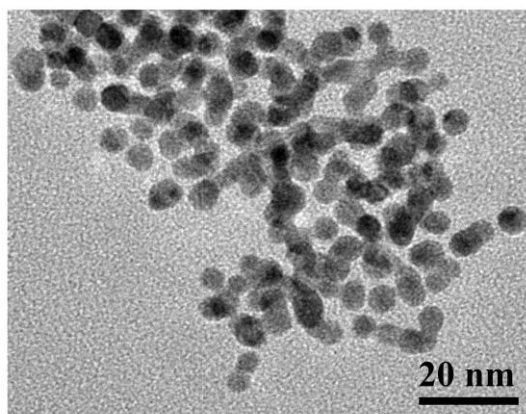

**Fig. S2** SEM image of Au NPs.

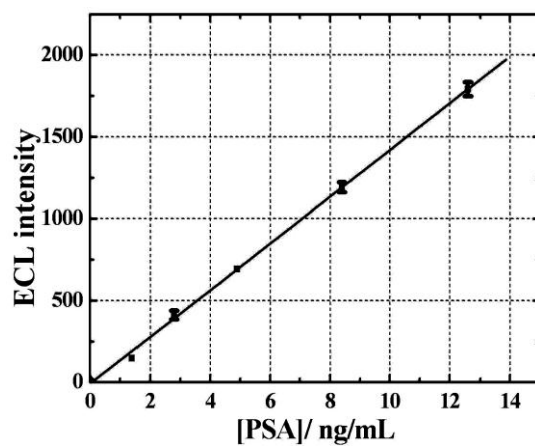

**Fig. S3** Determination of PSA concentration in human serum blood using standard addition method. (PSA concentrations  $x$ ,  $x+1.4$ ,  $x+2.8$ ,  $x+4.9$ ,  $x+8.4$ , and  $x+12.6$  ng/mL).
